# Supplementary material for: Increasing the Number of Biopsy Cores Around Prostate Cancer Targeted Lesions in the Transition Zone to Improve Biopsy Accuracy: A Combined Retrospective and Prospective Study
Source: Research Square preprint supplement (doi:10.21203/rs.3.rs-5011281/v1), 2024-10-18
Supplement: Supplementary file 1 [file 9efdc599c95a92592a440a4c.xlsx]

## Sheet: Sheet1
Variable	Retrospective study cohort 12+X		Prospective study cohort
			12+X		18+X
Study patients, n	217		120		280
Median age, yr (IQR)	69	(65, 75)	70	(65, 75)	70	(65, 75)
Median initial PSA, ng/ml (IQR)	17	(7, 22)	12	(8, 21)	12	(8, 20)
PI-RADS score, n (%)
4	92	(42)	76	(63)	164	(59)
5	125	(58)	44	(37)	116	(41)
Mapping Lesions, n (%)
PZ	121	(56)	60	(50)	122	(44)
TZ	83	(38)	51	(42)	145	(52)
PZ+TZ	13	(6)	9	(8)	13	(5)
Median number of positive system biopsy cores, n (IQR)	4	(2, 6)	2	(0, 6)	4	(1, 8)
PCa patients, n (%)	217	(100)	88	(73)	234	(84)
PZ	121	(56)	49	(56)	98	(42)
TZ	83	(38)	33	(37)	127	(54)
PZ+TZ	13	(6)	6	(7)	9	(4)
Biopsy ISUP GG, n (%)
1	30	(14)	20	(23)	48	(21)
PZ	10	(33)	9	(45)	12	(25)
TZ	18	(60)	11	(55)	35	(73)
PZ+TZ	2	(7)	0	(0)	1	(2)
>1	187	(86)	68	(77)	186	(79)
PZ	111	(59)	40	(59)	86	(47)
TZ	65	(35)	22	(32)	92	(49)
PZ+TZ	11	(6)	6	(9)	8	(4)
Median lesion volume ratio, % (IQR)	3	(1, 6)	2	(1, 4)	2	(1, 5)
Patients underwent RP, n (%)	217	(100)	64	(73)	156	(67)
PZ	121	(56)	34	(53)	61	（39）
TZ	83	(38)	25	(39)	89	（57）
PZ+TZ	13	(6)	5	(8)	6	（4）
Pathologic ISUP GG, n (%)
1	10	(5)	3	(5)	10	(6)
PZ	4	(40)	1	(33)	2	(20)
TZ	4	(40)	2	(67)	8	(80)
PZ+TZ	2	(20)	0	(0)	0	(0)
>1	207	(95)	61	(95)	146	(94)
PZ	117	(57)	33	(54)	59	(40)
TZ	79	(38)	23	(38)	81	(56)
PZ+TZ	11	(5)	5	(8)	6	(4)
